# Supplementary material for: A Continuing Professional Development Program for Pharmacists Implementing Pharmacogenomics into Practice
Source: PubMed Central journal article supplement (PMC7356265; doi:10.3390/pharmacy8020055), 2020-03-28
Supplement: pharmacy-08-00055-s001.pdf [file pharmacy-08-00055-s001.pdf]

Table S1: Training Program Description

| Session Title                                                                                                             | Learning Objectives                                                                                                                                                                                                                                                                                                                                                                                                                                                                            |
|---------------------------------------------------------------------------------------------------------------------------|------------------------------------------------------------------------------------------------------------------------------------------------------------------------------------------------------------------------------------------------------------------------------------------------------------------------------------------------------------------------------------------------------------------------------------------------------------------------------------------------|
| <b>Pharmacogenomics Core Concepts</b>                                                                                     |                                                                                                                                                                                                                                                                                                                                                                                                                                                                                                |
| Pharmacogenomics:<br>Core Concepts                                                                                        | <ol style="list-style-type: none"> <li>1. Explain relevant genomic terminology and concepts.</li> <li>2. Identify pharmacokinetic and pharmacodynamics sources of genetic variation.</li> <li>3. Describe the impact of common genetic variations in CYP450 enzymes on anticipated drug response.</li> <li>4. Identify common genetic variants in drug transporters and drug targets (e.g. SLC01B1, VKORC1) that impact response to drug therapy</li> </ol>                                    |
| Pharmacogenomics:<br>Application to Pharmacy<br>Practice                                                                  | <ol style="list-style-type: none"> <li>1. Interpret a genotype for a given P450 enzyme and describe anticipated response on drug action.</li> <li>2. Describe the available information sources for interpreting pharmacogenomic information</li> <li>3. Describe the role of the CPIC guidelines.</li> <li>4. Describe the pharmacist role in the field of pharmacogenomics</li> </ol>                                                                                                        |
| Genotyping Laboratory<br>Procedures                                                                                       | <ol style="list-style-type: none"> <li>1. Describe the process of pharmacogenomics testing, from sample collection to report generation.</li> </ol>                                                                                                                                                                                                                                                                                                                                            |
| <b>Applications of Pharmacogenomics in Practice</b>                                                                       |                                                                                                                                                                                                                                                                                                                                                                                                                                                                                                |
| Pharmacogenomics in<br>Psychopharmacology:<br>Antidepressants,<br>Anxiolytics and<br>Antipsychotics                       | <ol style="list-style-type: none"> <li>1. Identify which gene-drug relationships have evidence to support their implementation for antidepressant and antipsychotic therapy.</li> <li>2. Summarize the CPIC<sup>1</sup> guideline recommendations for pharmacogenetics of relevant antidepressant therapy including selective serotonin reuptake inhibitors and tricyclic antidepressants.</li> <li>3. Discuss potential applications of pharmacogenetics to antipsychotic therapy.</li> </ol> |
| Pharmacogenomics:<br>Opioid therapy                                                                                       | <ol style="list-style-type: none"> <li>1. Describe the impact of genetic polymorphisms on anticipated response to opioid therapy.</li> <li>2. Describe the evidence-based guideline recommendations for codeine therapy based on CYP2D6 genotype.</li> </ol>                                                                                                                                                                                                                                   |
| Cardiovascular<br>Pharmacogenomics                                                                                        | <ol style="list-style-type: none"> <li>1. Describe the evidence and guideline recommendations for genotype guided warfarin dosing.</li> <li>2. Describe the impact of CYP2C19 polymorphisms on clopidogrel therapy.</li> <li>3. Discuss the impact of SC01B1 polymorphisms on risk of adverse effects with simvastatin therapy.</li> </ol>                                                                                                                                                     |
| Case Discussions:<br>Applying Pharmacogeno-<br>mic Testing in Practice                                                    | <ol style="list-style-type: none"> <li>1. Interpret a pharmacogenetic testing report.</li> <li>2. For a given patient scenario, identify relevant pharmacogenetic variations that may impact drug therapy, and develop recommendations to optimize therapy.</li> </ol>                                                                                                                                                                                                                         |
| Implementing<br>Pharmacogenomic<br>Testing into Practice:<br>Communicating with Pati-<br>ents and the Health Care<br>Team | <ol style="list-style-type: none"> <li>1. Describe an approach to educate both a patient and other healthcare professionals about pharmacogenomics test results.</li> <li>2. Describe the key pieces of information to include in documentation of pharmacogenomic testing results and treatment plans.</li> <li>3. Discuss ethical and legal implications of pharmacogenomic testing.</li> </ol>                                                                                              |

<sup>1</sup>CPIC - Clinical Pharmacogenetic Implementation Consortium <https://cpicpgx.org/guidelines/>
